# Supplementary material for: First Detection of the Crayfish Plague Pathogen Aphanomyces astaci in Costa Rica: European Mistakes Should Not Be Repeated
Source: Frontiers journal article supplement (doi:10.3389/fevo.2021.623814), 2021-06-17
Supplement: Table_1.DOCX [file Table_1.DOCX]

**Supporting information:**

**Table S1:** *Procambarus clarkii* collected and analyzed in the present study. All specimens were collected by Ángel José Correa-Villalona and Juan Carlos Azofeifa-Solano from Reservoir Cachí. Sample type (Molt or Pereipod) identification code (ID code), mitochondrial ribosomal small subunit haplotype (rnnS haplotype), mitochondrial ribosomal large subunit haplotype (rnnL haplotype), mitochondrial genetic group (mtDNA Haplogroup) and GenBank accession numbers (GenBank accession) are provided. Samples testing positive and used for the molecular analyses appear in grey and bold.

| Sample type | ID code | rnnS Hap | rnnL Hap | mtDNA Haplogroup | GenBank accession |
| --- | --- | --- | --- | --- | --- |
| Molt | 1 CR | - | - | - | - |
| Pereiopod | 2 CR | - | - | - | - |
| Pereiopod | **3 CR** | **-** | **d1/d2** | **D** | **MW181669** |
| Pereiopod | 4 CR | - | - | - | - |
| Pereiopod | **5 CR** | **-** | **d1/d2** | **D** | **MW181670** |
| Pereiopod | 6 CR | - | - | - | - |
| Pereiopod | 7 CR | - | - | - | - |
| Pereiopod | **8 CR** | **-** | **d1/d2** | **D** | **MW181671** |
| Pereiopod | 9 CR | - | - | - | - |
| Pereiopod | **10 CR** | **-** | **d1/d2** | **D** | **MW181672** |
| Pereiopod | 11 CR | - | - | - | - |
| Pereiopod | 12 CR | - | - | - | - |
| Pereiopod | 13 CR | - | - | - | - |
| Pereiopod | 14 CR | - | - | - | - |
| Pereiopod | 15 CR | - | - | - | - |
| Pereiopod | 16 CR | - | - | - | - |
| Pereiopod | 17 CR | - | - | - | - |
| Pereiopod | 18 CR | - | - | - | - |
| Pereiopod | 19 CR | - | - | - | - |
| Pereiopod | 20 CR | - | - | - | - |
| Pereiopod | 21 CR | - | - | - | - |
| Pereiopod | 22 CR | - | - | - | - |
| Molt | 23 CR | - | - | - | - |
| Pereiopod | 24 CR | - | - | - | - |
| Pereiopod | 25 CR | - | - | - | - |
| Pereiopod | 26 CR | - | - | - | - |
| Pereiopod | 27 CR | - | - | - | - |
| Pereiopod | 28 CR | - | - | - | - |
| Pereiopod | 29 CR | - | - | - | - |
| Pereiopod | 30 CR | - | - | - | - |
| Pereiopod | 31 CR | - | - | - | - |
| Pereiopod | 32 CR | - | - | - | - |
| Pereiopod | 33 CR | - | - | - | - |
| Pereiopod | 34 CR | - | - | - | - |
| Pereiopod | 35 CR | - | - | - | - |
| Pereiopod | 36 CR | - | - | - | - |
| Pereiopod | 37 CR | - | - | - | - |
| Pereiopod | 38 CR | - | - | - | - |
| Pereiopod | 39 CR | - | - | - | - |
| Pereiopod | 40 CR | - | - | - | - |
| Pereiopod | 41 CR | - | - | - | - |
| Pereiopod | 42 CR | - | - | - | - |
| Pereiopod | 43 CR | - | - | - | - |
| Pereiopod | 44 CR | - | - | - | - |
| Pereiopod | 45 CR | - | - | - | - |
| Pereiopod | 46 CR | - | - | - | - |
| Pereiopod | 47 CR | - | - | - | - |
| Pereiopod | 48 CR | - | - | - | - |
